# Supplementary material
Source: PubMed Central journal article supplement (PMC3493877)
Supplement: NIHMS404535-supplement-1.pdf [file NIHMS404535-supplement-1.pdf]

## Supplementary Material

Immunomodulatory glycan LNFPIII alleviates hepatosteatosis and insulin resistance through direct and indirect control of metabolic pathways

Perna Bhargava<sup>1</sup>, Changlin Li<sup>2</sup>, Kristopher J. Stanya<sup>1</sup>, David Jacobi<sup>1,3</sup>, Lingling Dai<sup>1,4</sup>, Sihao Liu<sup>1</sup>, Matthew R. Gangl<sup>1</sup>, Donald A. Harn<sup>2</sup>, Chih-Hao Lee<sup>1</sup>.

<sup>1</sup>Department of Genetics and Complex Diseases, Division of Biological Sciences, Harvard School of Public Health, 665 Huntington Ave, Boston, MA 02115, USA

<sup>2</sup>Department of Infectious Diseases, College of Veterinary Medicine, University of Georgia, Athens, GA 30602, USA.

<sup>3</sup>CHRU de Tours, Service de Médecine Interne-Nutrition, INSERM U 1069, Université François Rabelais, Tours, France

<sup>4</sup>Pharmacogenetics Research Institute, Institute of Clinical Pharmacology, Central South University, Changsha, Hunan, People's Republic of China

Correspondence should be addressed:

Chih-Hao Lee, PhD. e-mail: [clec@hsph.harvard.edu](mailto:clec@hsph.harvard.edu)

Donald A. Harn, PhD. e-mail: [dharn@uga.edu](mailto:dharn@uga.edu)

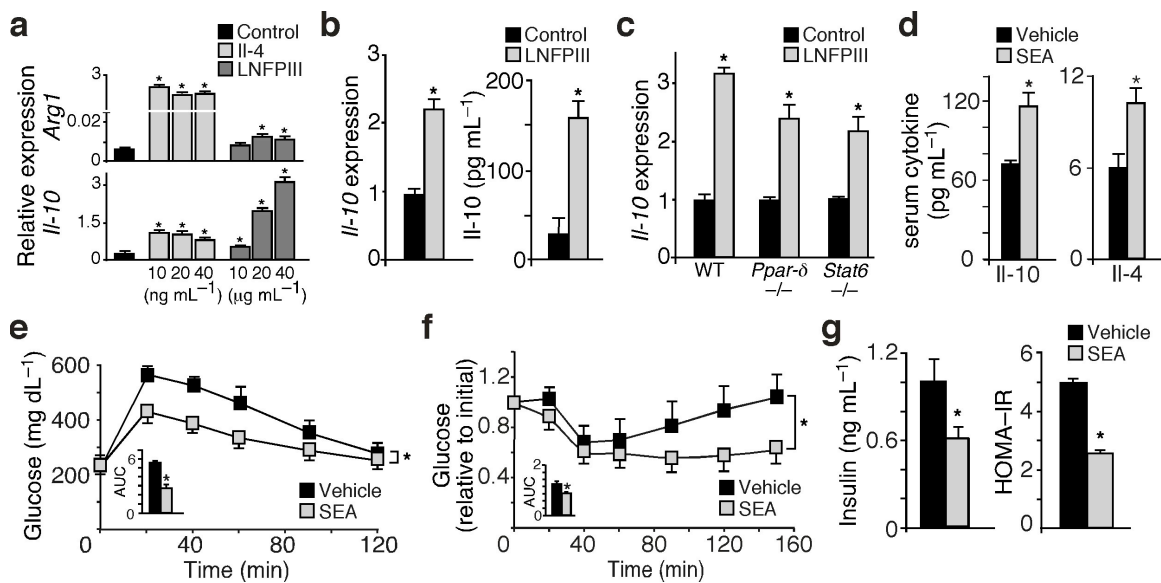

**Supplementary Figure 1** Induction of Il-10 by LNFPIII is independent of Th2 cytokines. (a) Real-time q-PCR analyses examining the expression of *Il-10* and *Arg1* in bone marrow derived macrophages treated with 10, 20 or 40 ng mL<sup>-1</sup> of Il-4 or 10, 20 or 40 μg mL<sup>-1</sup> of LNFPIII. (b) The expression (left panel) and production (right panel) of Il-10 by LNFPIII (20 μg mL<sup>-1</sup>) in dendritic cells. (c) *Il-10* expression determined by real-time q-PCR in wild-type (WT), *Ppar-δ*<sup>-/-</sup> and *Stat6*<sup>-/-</sup> macrophages given 20 μg mL<sup>-1</sup> LNFPIII overnight. (d) Serum Il-10 and Il-4 concentrations in vehicle or SEA treated mice (*n* = 4–6 per treatment). (e) Glucose tolerance test and (f) insulin tolerance test in high fat fed mice (*n* = 4–6) treated with vehicle or SEA (25 μg, twice a week). Inset: area under the curve (AUC). (g) Fasting insulin concentrations and HOMA-IR to assess insulin sensitivity in vehicle and SEA treated mice. Values are expressed as means ± SEM. For *in vitro* assays, the mean and SEM were determined from 3–4 biological replicates for a representative experiment. Experiments were repeated three times. *In vivo* studies were reproduced in three mouse cohorts (*n* = 4–6 per treatment). \**P* < 0.05 (SEA versus vehicle control).

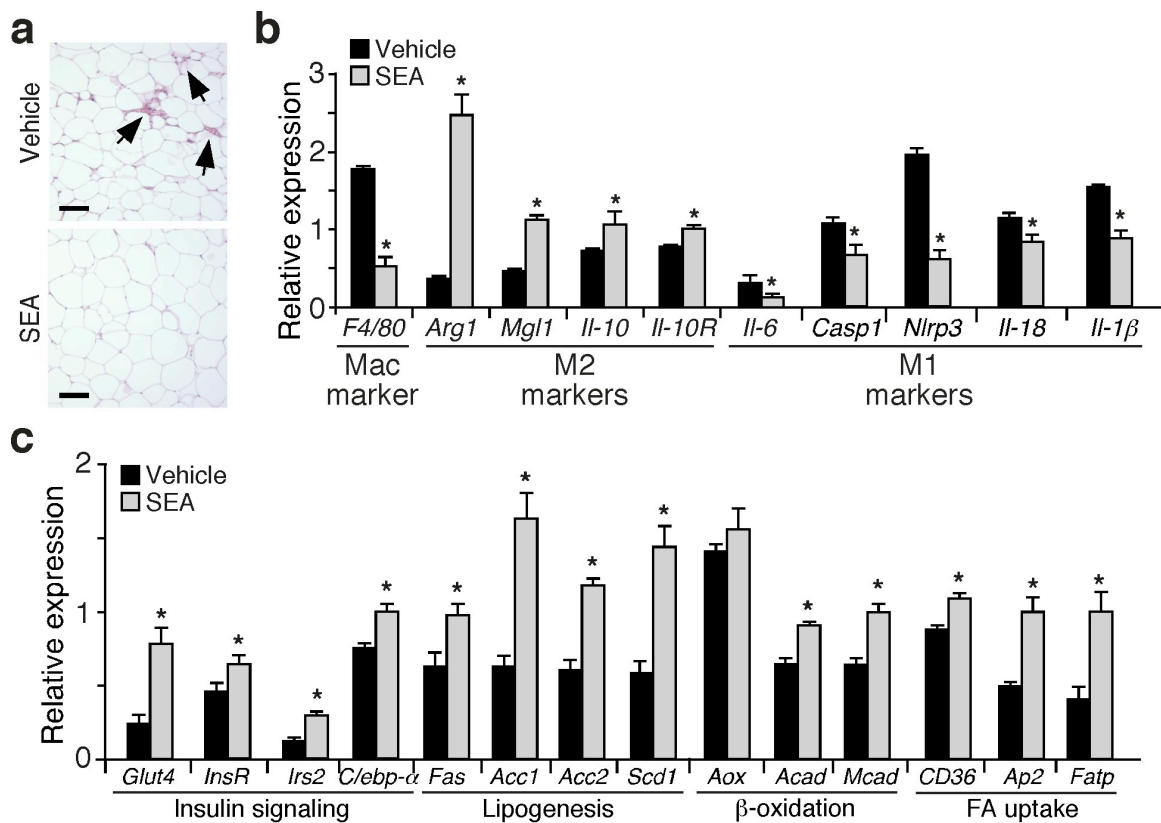

**Supplementary Figure 2** SEA reduces inflammation and improves metabolic homeostasis in WAT. **(a)** WAT histology showing crown-like structures (indicated with arrows). Scale bar = 200  $\mu$ m. **(b)** Real-time q-PCR analyses examining the expression of M1 and M2 genes in WAT from vehicle or SEA treated mice ( $n = 5$  per treatment). **(c)** WAT metabolic gene expression. Values are expressed as means  $\pm$  SEM. Metabolic studies were reproduced in three mouse cohorts ( $n = 4-6$  per treatment). Histology and expression analyses were examined in one and two of the three cohorts, respectively.  $*P < 0.05$  (SEA versus vehicle control).

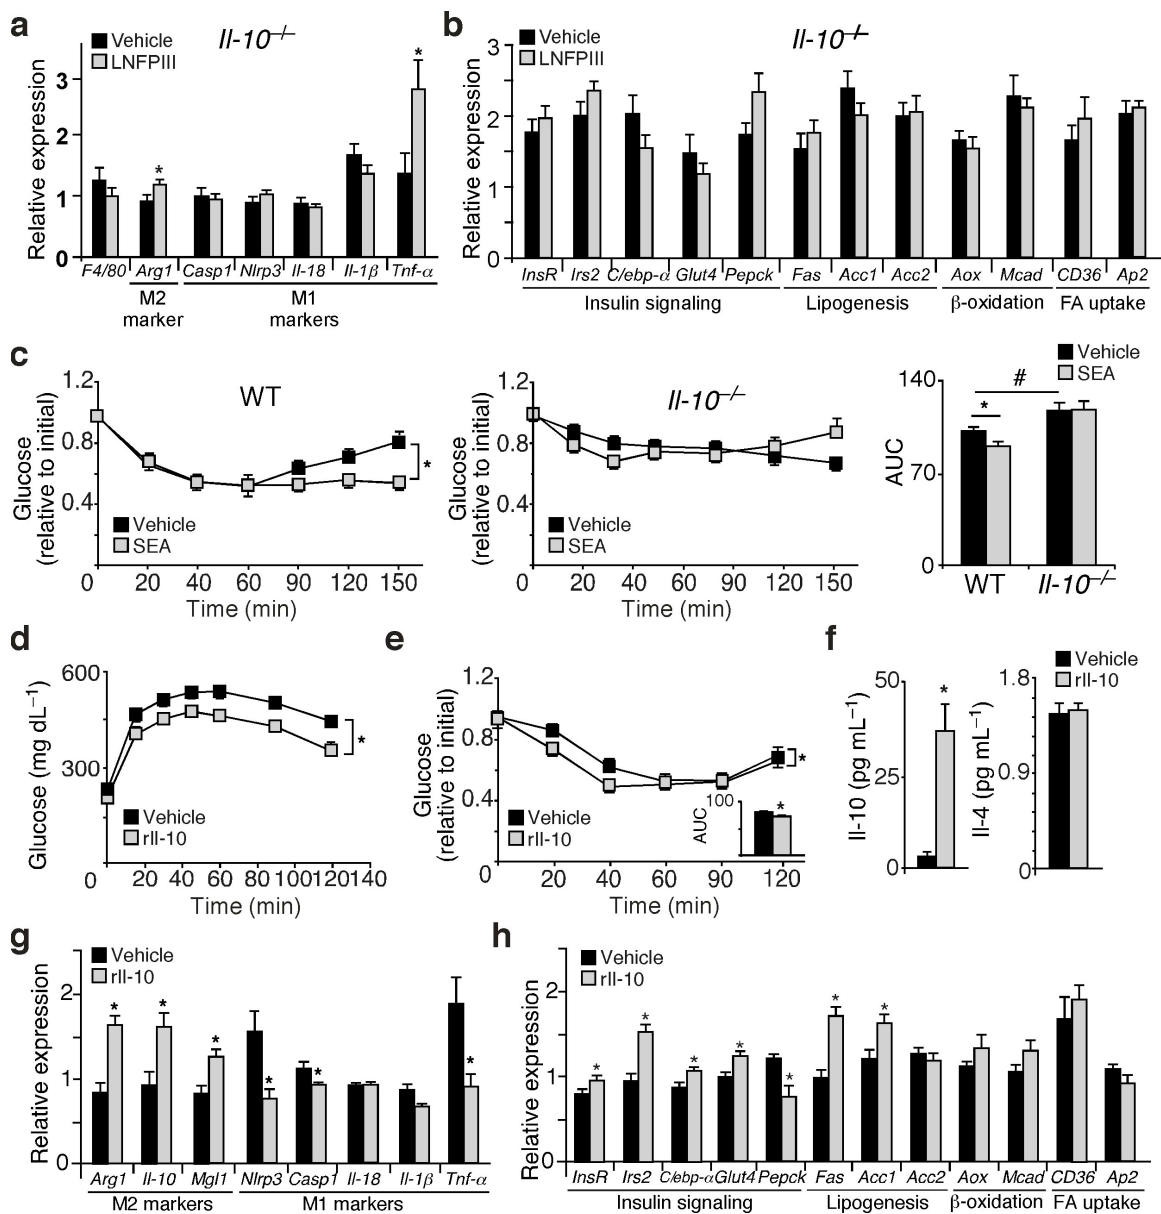

**Supplementary Figure 3** The insulin sensitizing activity of LNFPIII and SEA is mediated by Il-10. **(a and b)** The expression of inflammatory and metabolic genes in WAT of *Il-10<sup>-/-</sup>* mice treated with vehicle or LNFPIII ( $n = 6$  per treatment). **(c)** Insulin tolerance test in wild-type (WT, left panel) and *Il-10<sup>-/-</sup>* mice (middle panel) treated with vehicle or SEA ( $n = 6$  per treatment). Right panel: area under the curve of ITT. **(d)** Glucose tolerance and **(e)** insulin tolerance test in high fat fed male C57BL/6J mice given PBS (vehicle) or rIl-10 (1  $\mu$ g, every other day, 3 doses,  $n = 6$  per treatment). **(f)** Serum Il-10 and Il-4 concentrations in vehicle or rIl-10 treated mice. **(g and h)** The expression of inflammatory and metabolic genes in WAT of mice treated with vehicle or rIl-10 ( $n = 6$  per treatment). Values are expressed as means  $\pm$  SEM. Studies using *Il-10<sup>-/-</sup>* and control mice ( $n = 6$ ) and in rIl-10 treatment ( $n = 6$ ) were conducted in 1 cohort. \* $P < 0.05$  (treatment versus vehicle control); # $P < 0.05$  (*Il-10<sup>-/-</sup>* versus wt).

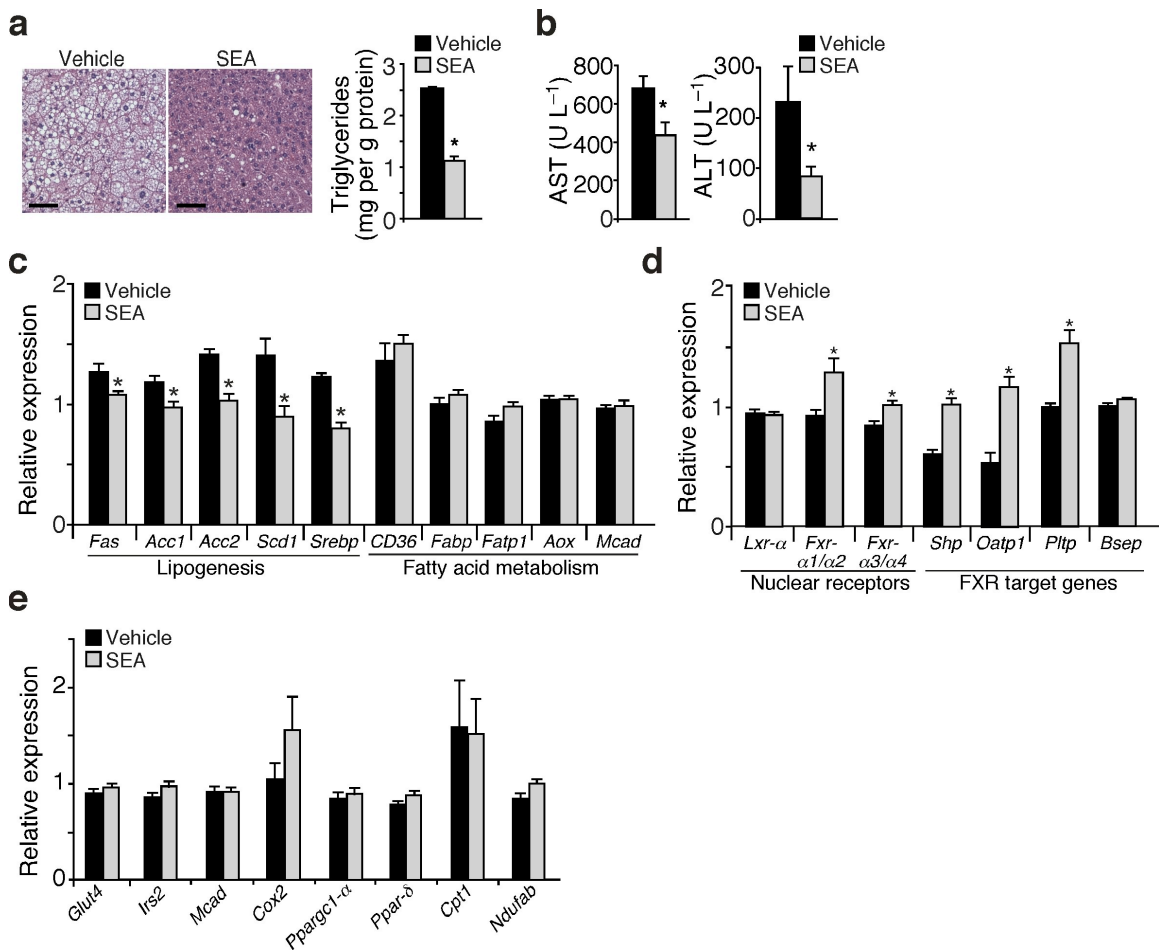

**Supplementary Figure 4** SEA protects against hepatic steatosis and suppresses lipogenic gene expression. **(a)** Liver histology and triglyceride content analyses to determine hepatic fat accumulation in vehicle and SEA treated mice. Scale bar = 100  $\mu$ m. **(b)** Circulating AST and ALT concentrations to assess liver function. **(c and d)** Expression analyses of metabolic genes and nuclear receptor signaling pathways known to regulate lipogenesis in livers from vehicle or SEA treated mice ( $n = 5$ ) by real-time q-PCR. **(e)** Gene expression in muscle from vehicle or SEA treated mice determined by real-time q-PCR. Values are expressed as means  $\pm$  SEM. Metabolic studies were reproduced in 3 mouse cohorts ( $n = 4-6$  per treatment). Histology was examined in one and lipid and expression analyses were examined in two of the three cohorts. \* $P < 0.05$  (SEA versus vehicle control).

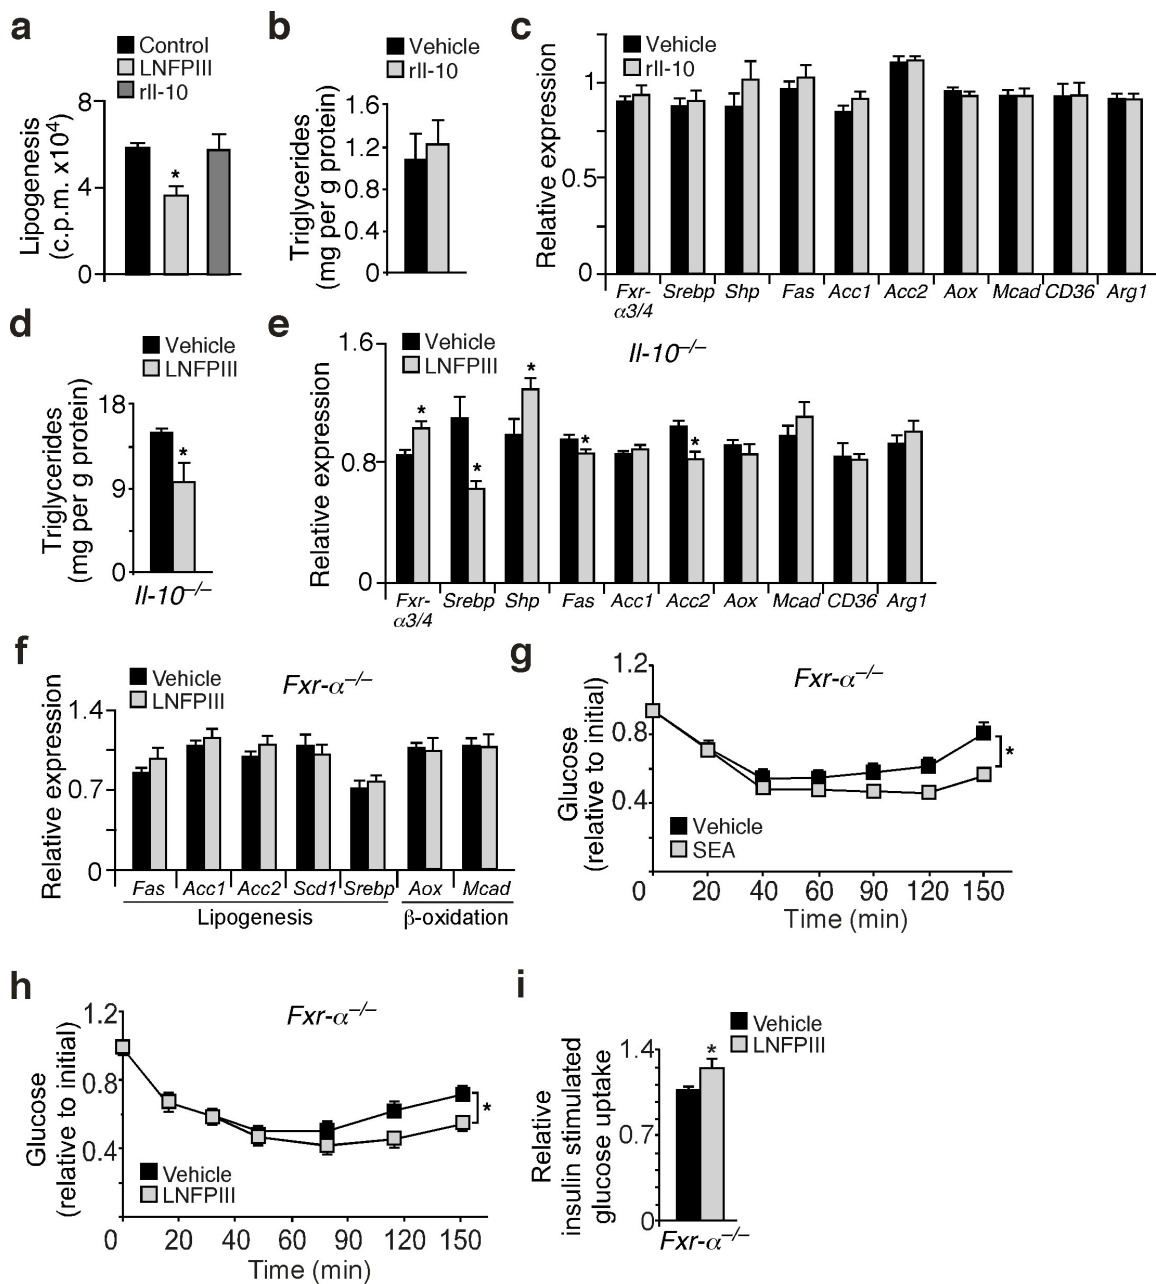

**Supplementary Figure 5** LNFPIII, but not Il-10, suppresses de novo lipogenesis in the liver. **(a)** *Ex vivo* lipogenesis assays in primary hepatocytes treated with vehicle, LNFPIII (20  $\mu\text{g ml}^{-1}$ ) or rIl-10 (10 ng  $\text{ml}^{-1}$ ) for 24 hr. **(b and c)** Triglyceride content and lipogenic gene expression in the liver from vehicle or rIl-10 treated mice ( $n = 6$ ). **(d and e)** Triglyceride content and lipogenic gene expression in the liver of *Il-10*<sup>-/-</sup> mice treated with vehicle or LNFPIII ( $n = 6$ ) **(f)** Gene expression analyses in livers of *Fxr*- $\alpha$ <sup>-/-</sup> mice treated with vehicle or LNFPIII ( $n = 6$ ) by real-time q-PCR. **(g and h)** Insulin tolerance tests in *Fxr*- $\alpha$ <sup>-/-</sup> mice ( $n = 6$ ) treated with vehicle, SEA or LNFPIII. **(i)** *Ex vivo* insulin stimulated glucose uptake in adipose tissue slices. Values are expressed as means  $\pm$  SEM. For *in vitro* assays, the mean and SEM were determined from 3–4 biological replicates for a representative experiment. Experiments were repeated three times. Studies using rIl-10 ( $n = 6$ ), *Il-10*<sup>-/-</sup> ( $n = 6$ ), *Fxr*- $\alpha$ <sup>-/-</sup> ( $n = 6$ ) and corresponding controls were performed in 1 mouse cohort. \* $P < 0.05$  (treatment versus control).

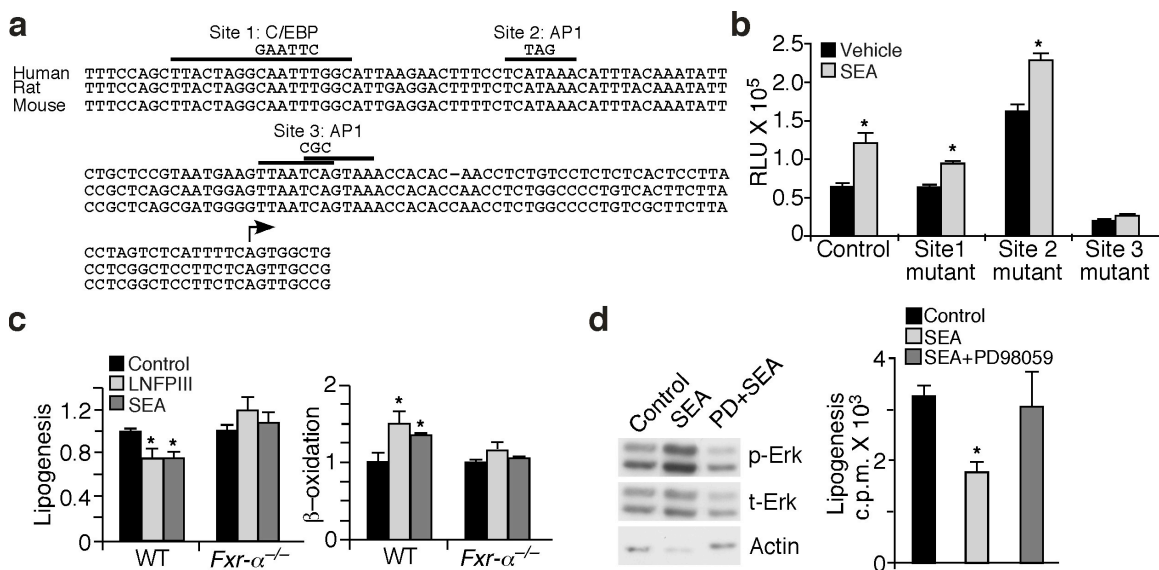

**Supplementary Figure 6** *Fxr-α* is a molecular target of LNFPIII and SEA. **(a)** Sequence comparison of the 5' proximal regulatory region of human, rat and mouse *FXR-α* downstream promoter (promoter 2). The transcriptional start site is indicated with an arrow. Putative binding sites for C/EBP (site 1) and AP1 (site 2 and site 3) are highlighted. Sequences mutated for the reporter assays are indicated above the highlighted binding sites. **(b)** Reporter assays showing that the induction of human *FXR-α* promoter 2 is mediated by AP1 binding sequences in site 3. Similar results were obtained with LNFPIII treatment (data not shown). **(c)** Lipogenic and fatty acid oxidation assays conducted in hepatocytes isolated from wild type (WT) or *Fxr-α*<sup>-/-</sup> mice treated with vehicle, LNFPIII (20 μg ml<sup>-1</sup>) or SEA (2 μg ml<sup>-1</sup>). **(d)** Left panel: Western blot analyses showing Erk phosphorylation in hepatocytes ± SEA ± PD98059. p-Erk: phospho-Erk; t-Erk: total Erk. Actin was included as a loading control. Right panel: *de novo* lipogenesis assays in hepatocytes. Values are expressed as means ± SEM. Mean and SEM were determined from 3–4 biological replicates for a representative experiment. Experiments were repeated three times. \**P* < 0.05 (SEA or LNFPIII versus vehicle control).

**Supplementary Table 1.** Metabolic parameters of mouse cohorts used in the study. Serum samples were collected after 6 h fasting. \* $P < 0.05$ .

a. WT mice treated with SEA and LNFPIII

| Treatment                               | Vehicle        | SEA            | Vehicle        | LNFPIII        |
|-----------------------------------------|----------------|----------------|----------------|----------------|
| Body weight (g)                         | 43.63 ± 1.74   | 41.62 ± 1.36   | 45.26 ± 0.94   | 46.86 ± 1.09   |
| WAT/body weight                         | 0.044 ± 0.0044 | 0.068 ± 0.002* | 0.031 ± 0.015  | 0.039 ± 0.001  |
| Liver/body weight                       | 0.042 ± 0.004  | 0.041 ± 0.003  | 0.038 ± 0.002  | 0.043 ± 0.002  |
| Triglyceride (mg dL <sup>-1</sup> )     | 102.38 ± 3.89  | 130.78 ± 7.52  | 67.17 ± 2.01   | 69.79 ± 1.18   |
| Free fatty acid (mmol L <sup>-1</sup> ) | 1.06 ± 0.05    | 1.14 ± 0.04    | 1.08 ± 0.08    | 1.02 ± 0.03    |
| Cholesterol (mg dL <sup>-1</sup> )      | 165.90 ± 8.59  | 166.78 ± 12.35 | 154.72 ± 14.06 | 144.24 ± 15.99 |
| Glucose (mg dL <sup>-1</sup> )          | 221.67 ± 15.17 | 221.17 ± 8.53  | 236.2 ± 18.45  | 217 ± 12.01    |
| Insulin (ng mL <sup>-1</sup> )          | 1.002 ± 0.156  | 0.615 ± 0.081* | 1.545 ± 0.065  | 1.288 ± 0.059* |
| Adiponectin (µg mL <sup>-1</sup> )      | 5.92 ± 0.16    | 6.35 ± 0.13    | 5.59 ± 0.32    | 5.84 ± 0.10    |

b. *Il-10*<sup>-/-</sup> mice treated with LNFPIII

| Treatment                               | Vehicle        | LNFPIII        |
|-----------------------------------------|----------------|----------------|
| Body weight (g)                         | 33.67 ± 3.84   | 37.03 ± 4.14   |
| WAT/body weight                         | 0.019 ± 0.004  | 0.028 ± 0.005  |
| Liver/body weight                       | 0.038 ± 0.002  | 0.032 ± 0.003  |
| Triglyceride (mg dL <sup>-1</sup> )     | 29.11 ± 1.11   | 36.14 ± 3.61   |
| Free fatty acid (mmol L <sup>-1</sup> ) | 0.49 ± 0.05    | 0.54 ± 0.08    |
| Cholesterol (mg dL <sup>-1</sup> )      | 136.36 ± 10.87 | 153.89 ± 19.95 |
| Glucose (mg dL <sup>-1</sup> )          | 132.17 ± 17.36 | 142.5 ± 16.42  |
| Insulin (ng mL <sup>-1</sup> )          | 0.260 ± 0.033  | 0.259 ± 0.048  |



c. WT mice treated with rIL-10

| Treatment                               | Vehicle       | rIL-10         |
|-----------------------------------------|---------------|----------------|
| Body weight (g)                         | 31.93 ± 1.75  | 32.67 ± 1.03   |
| WAT/body weight                         | 0.025 ± 0.001 | 0.032 ± 0.001* |
| Liver/body weight                       | 0.036 ± 0.001 | 0.035 ± 0.001  |
| Triglyceride (mg dL <sup>-1</sup> )     | 76.69 ± 5.04  | 84.83 ± 4.2    |
| Free fatty acid (mmol L <sup>-1</sup> ) | 0.57 ± 0.04   | 0.61 ± 0.06    |
| Cholesterol (mg dL <sup>-1</sup> )      | 106 ± 3.80    | 104.21 ± 4.31  |
| Glucose (mg dL <sup>-1</sup> )          | 226.5 ± 11.93 | 228 ± 8.47     |

d. *Fxr-α*<sup>-/-</sup> mice treated with LNFPIII

| Treatment                               | Vehicle        | LNFPIII        |
|-----------------------------------------|----------------|----------------|
| Body weight (g)                         | 40.73 ± 3.23   | 36.33 ± 3.54   |
| WAT/body weight                         | 0.029 ± 0.003  | 0.041 ± 0.003  |
| Liver/body weight                       | 0.046 ± 0.004  | 0.053 ± 0.011  |
| Triglyceride (mg dL <sup>-1</sup> )     | 46.12 ± 5.22   | 44.11 ± 4.90   |
| Free fatty acid (mmol L <sup>-1</sup> ) | 0.40 ± 0.02    | 0.49 ± 0.03    |
| Cholesterol (mg dL <sup>-1</sup> )      | 303.18 ± 27.10 | 315.47 ± 8.16  |
| Glucose (mg dL <sup>-1</sup> )          | 175 ± 4.38     | 150 ± 18.78    |
| Insulin (ng mL <sup>-1</sup> )          | 0.450 ± 0.025  | 0.198 ± 0.026* |
